# Supplementary material for: USP14 inhibition corrects an in vivo model of impaired mitophagy
Source: PubMed Central journal article supplement (PMC6220287; doi:10.15252/emmm.201809014), 2018-09-24

Fig S2A

SH-SY5Y

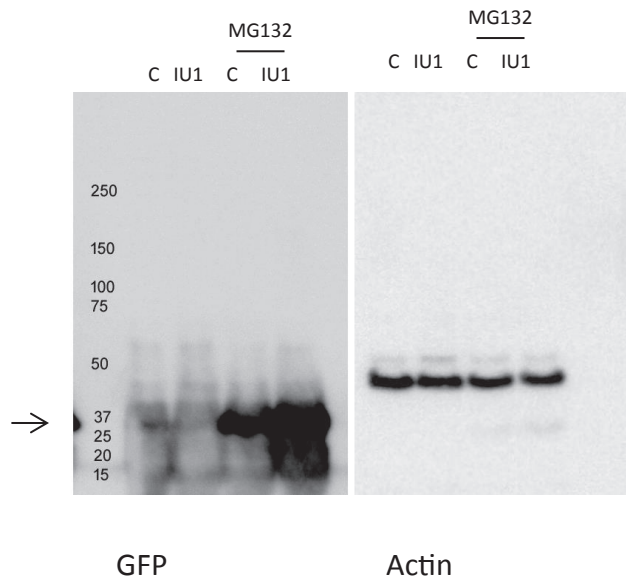

MEF

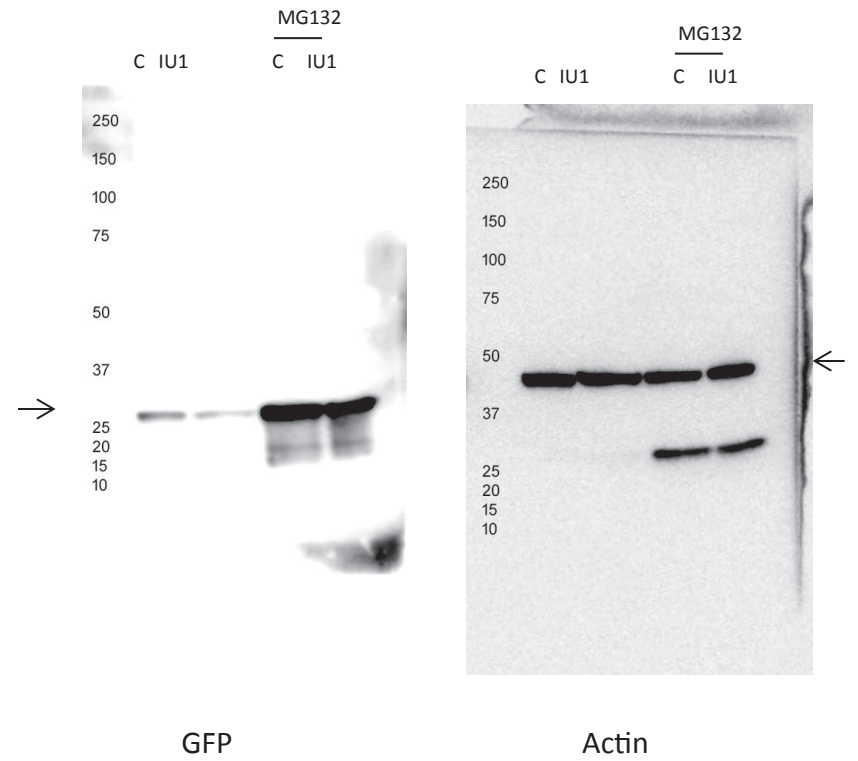

Fig S2B

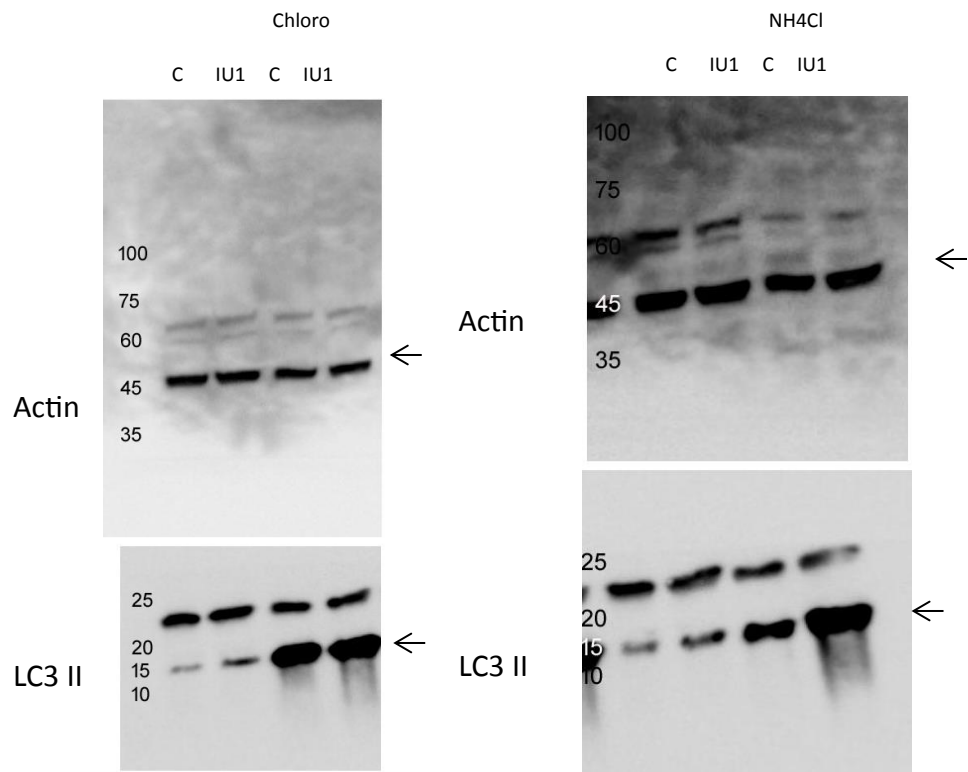

Fig S3A

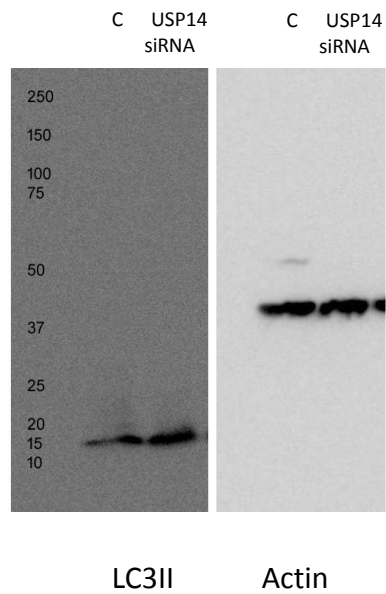

Fig S3D

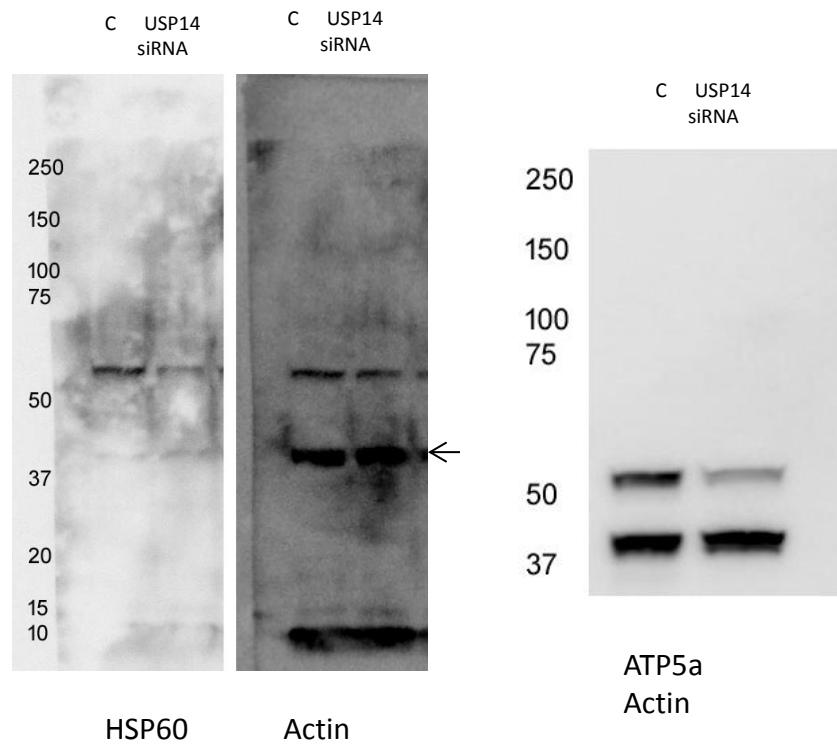



Fig S5B

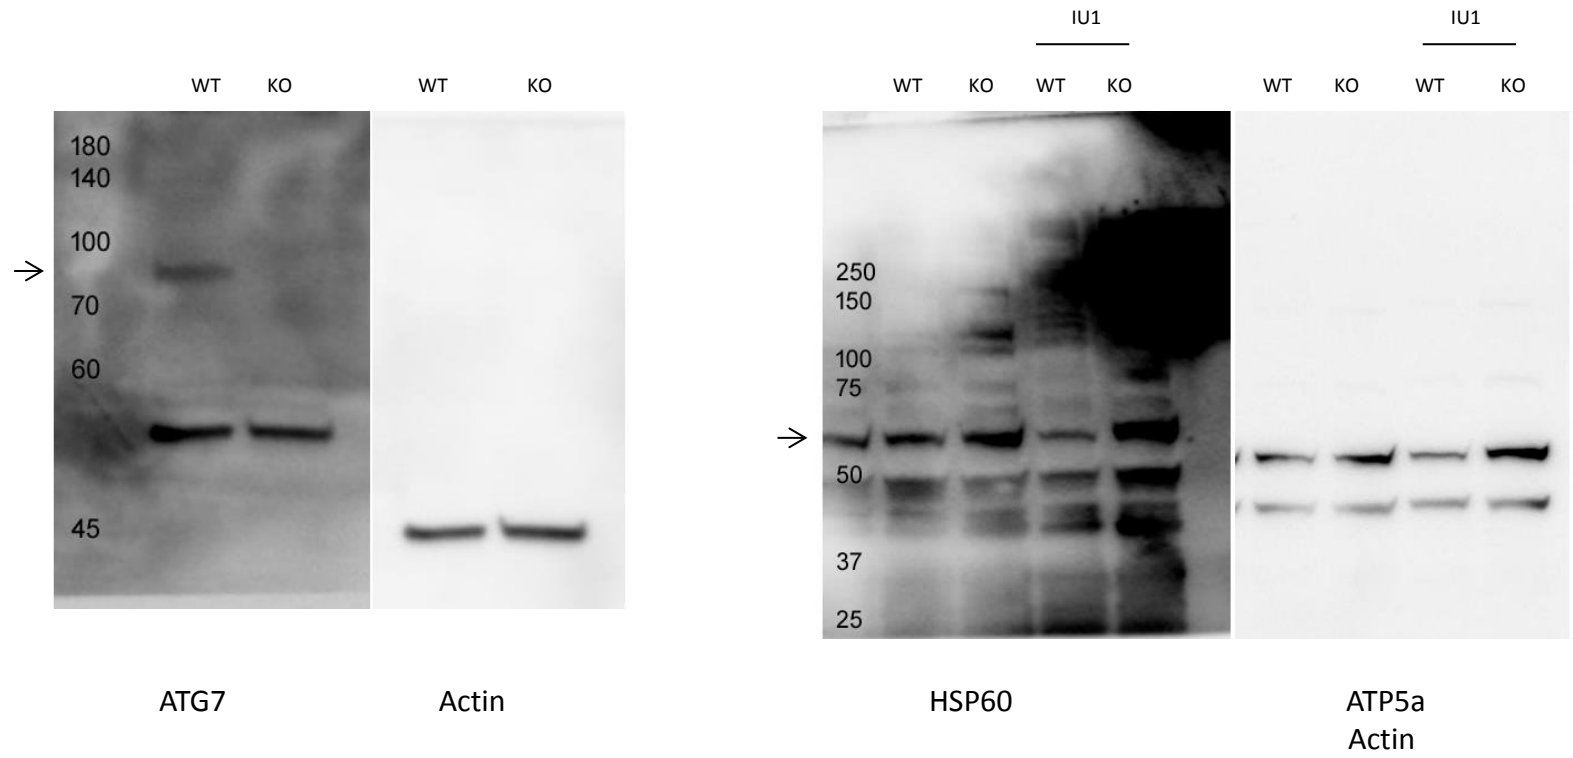

Fig S6A

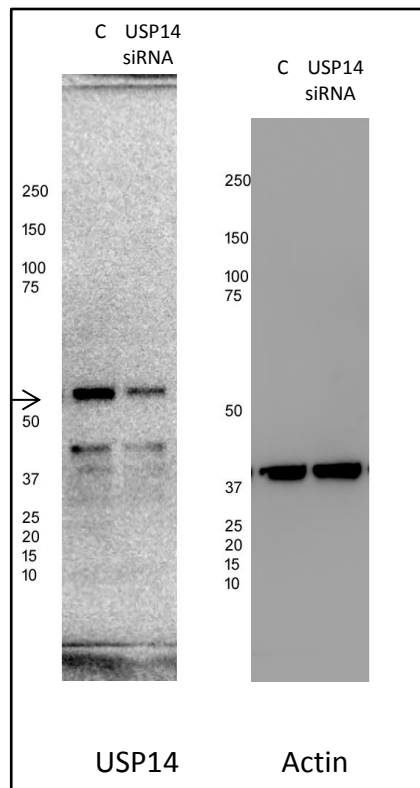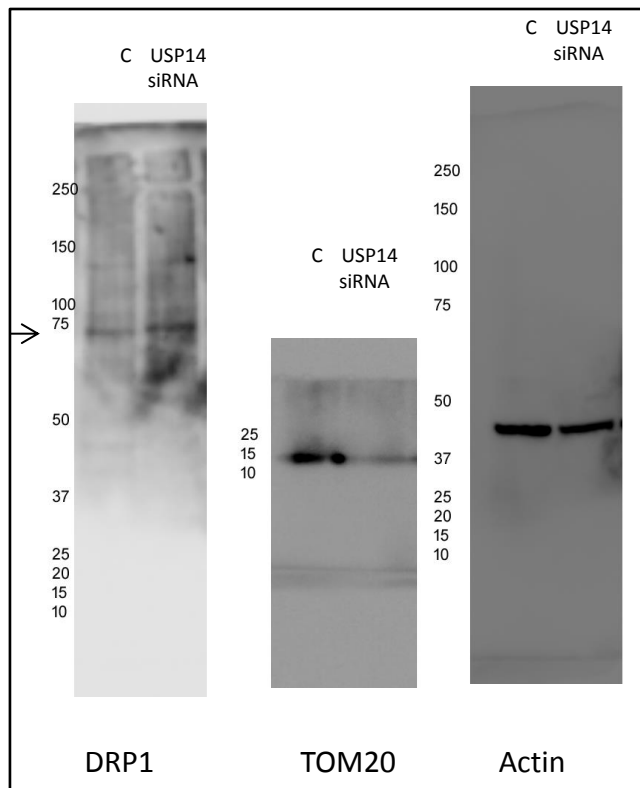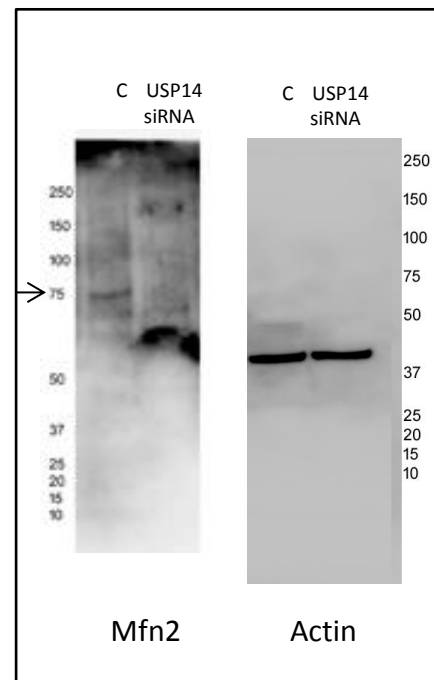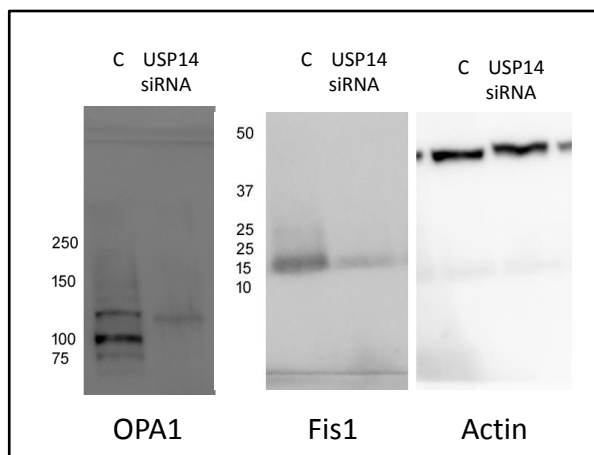

Fig S6C

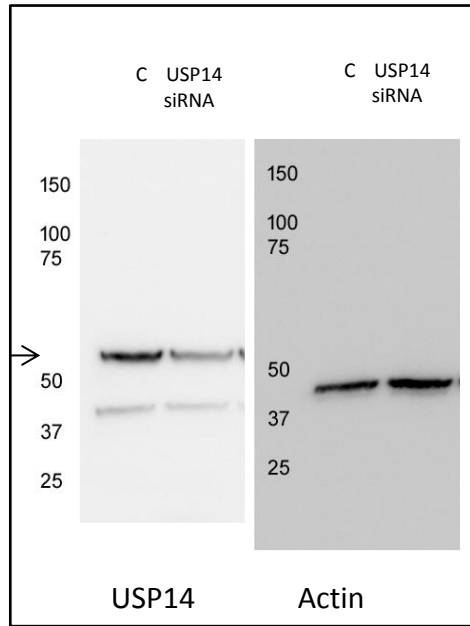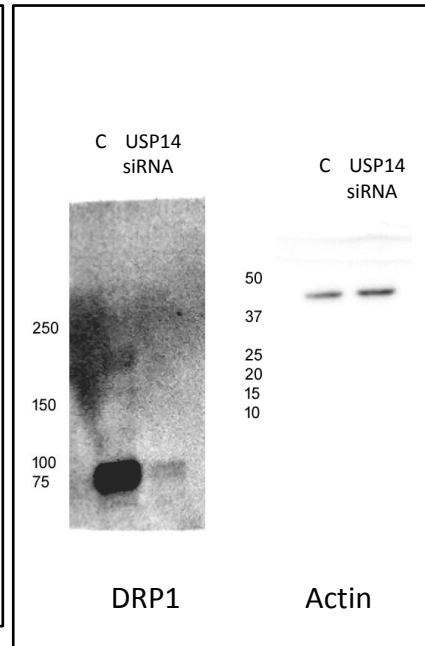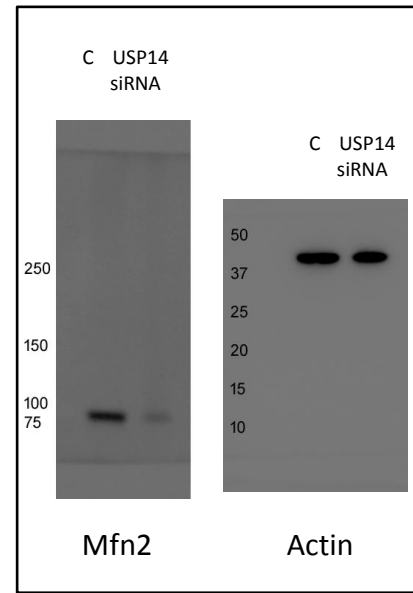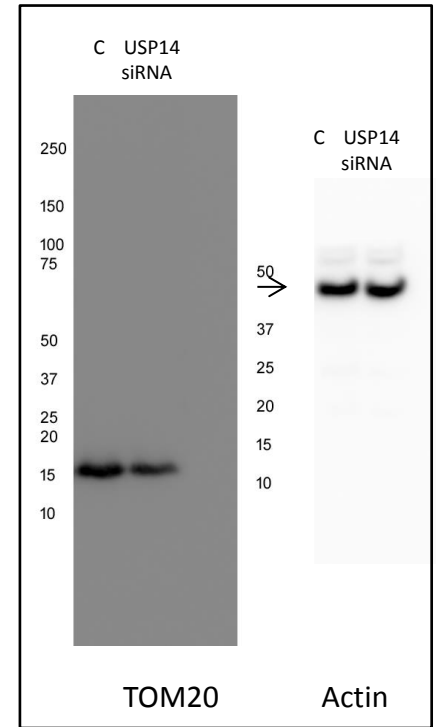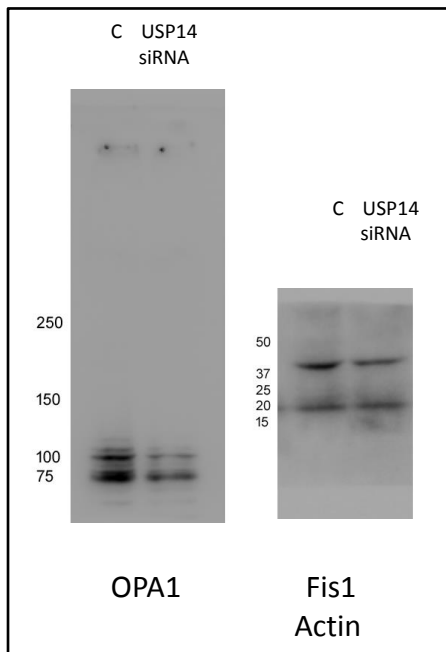

Fig S8C

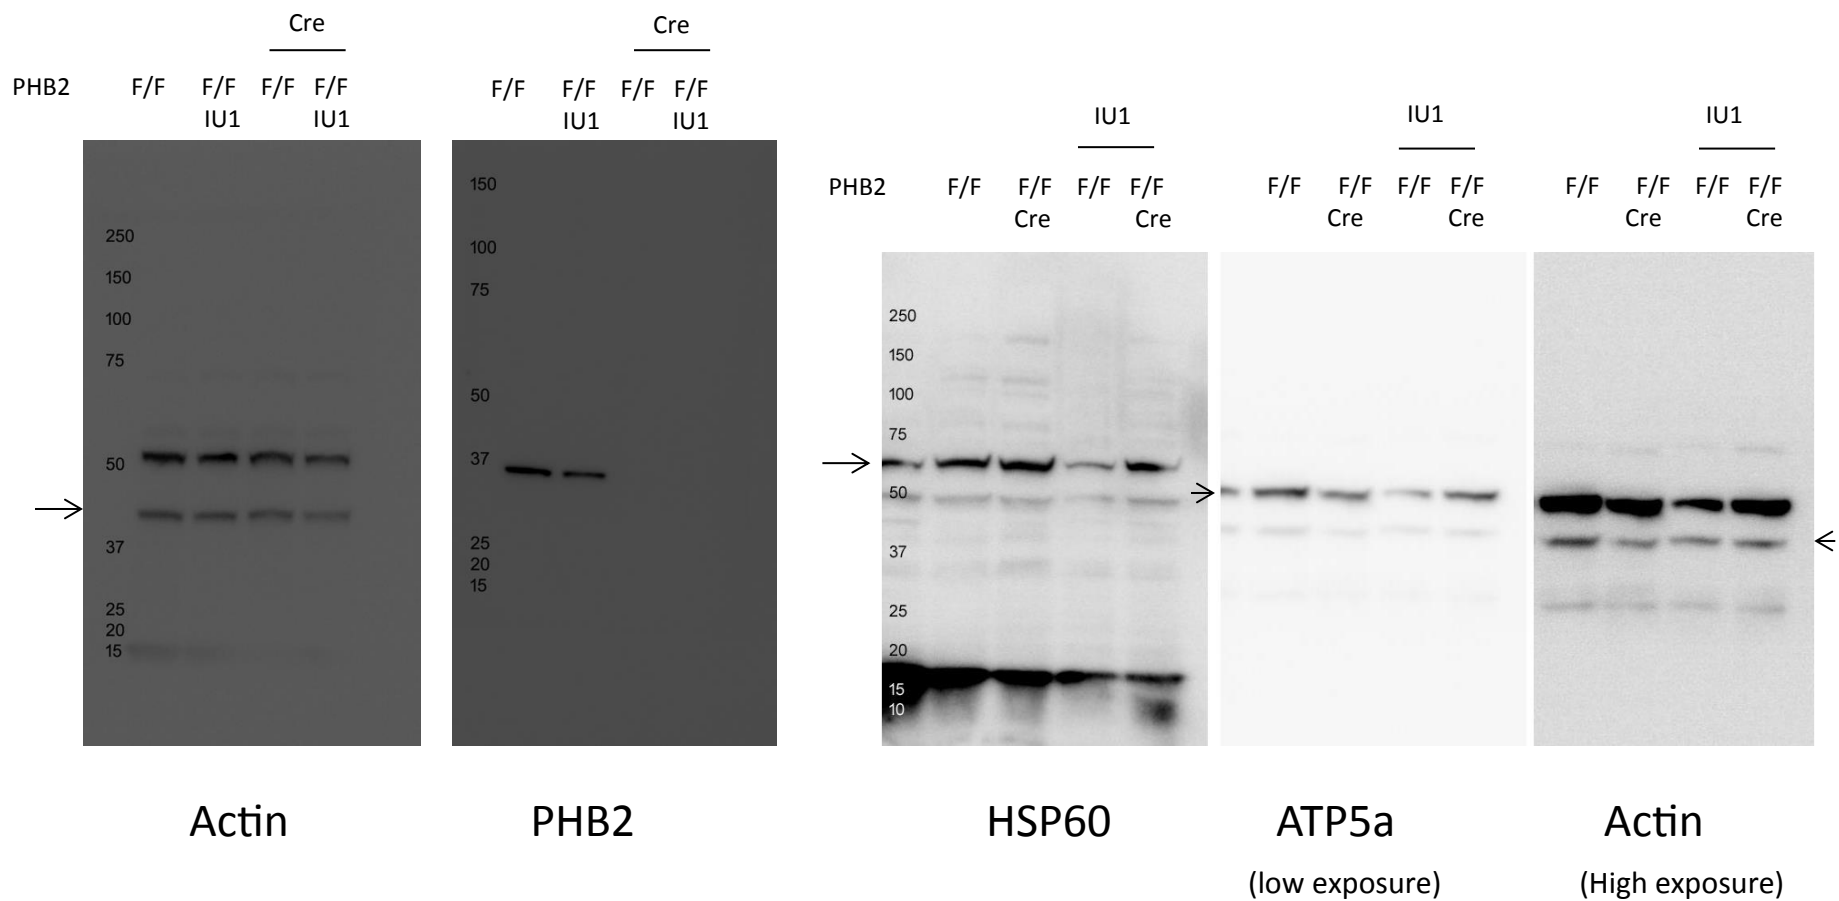



Fig S9

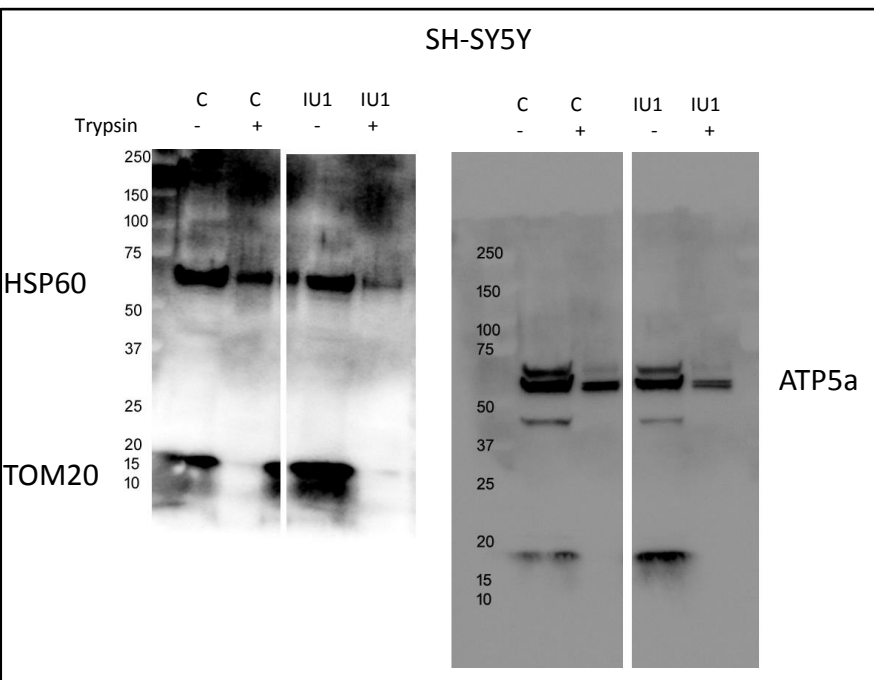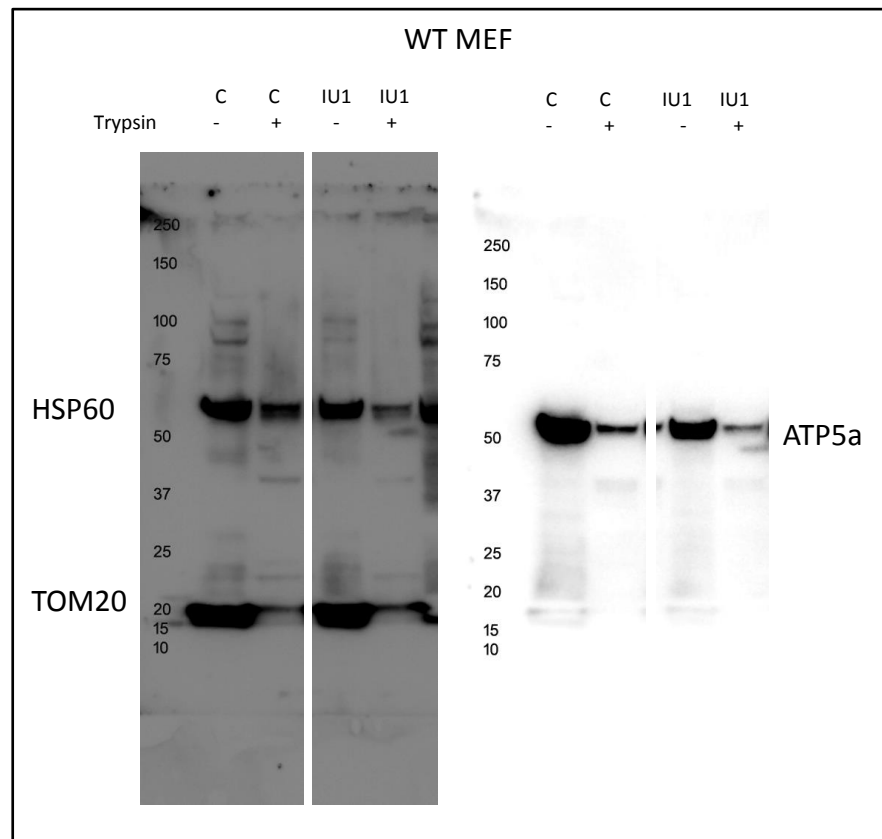

### PINK1 KO MEF

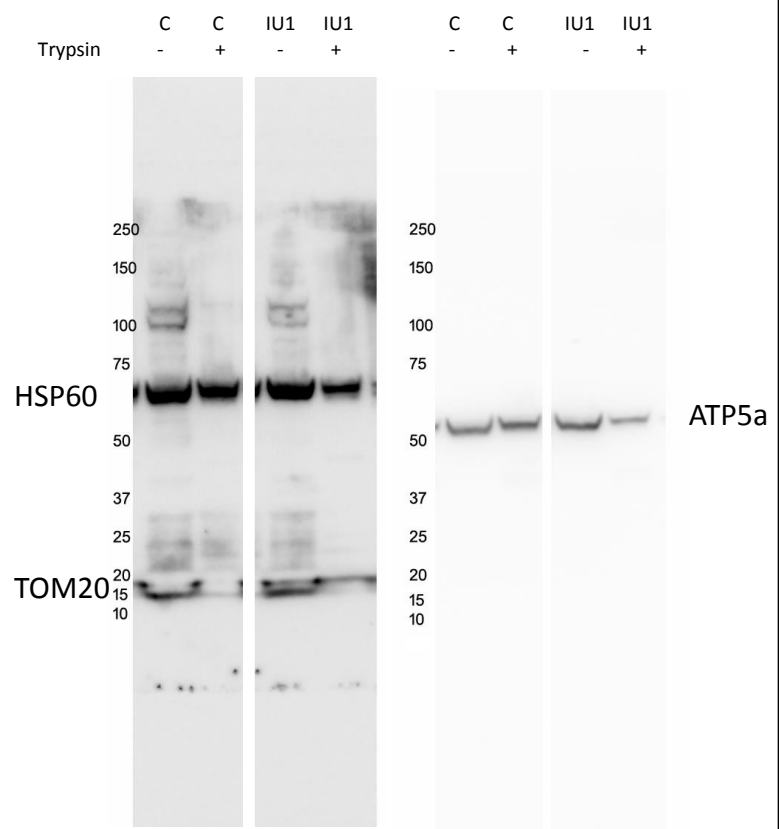

### Hela

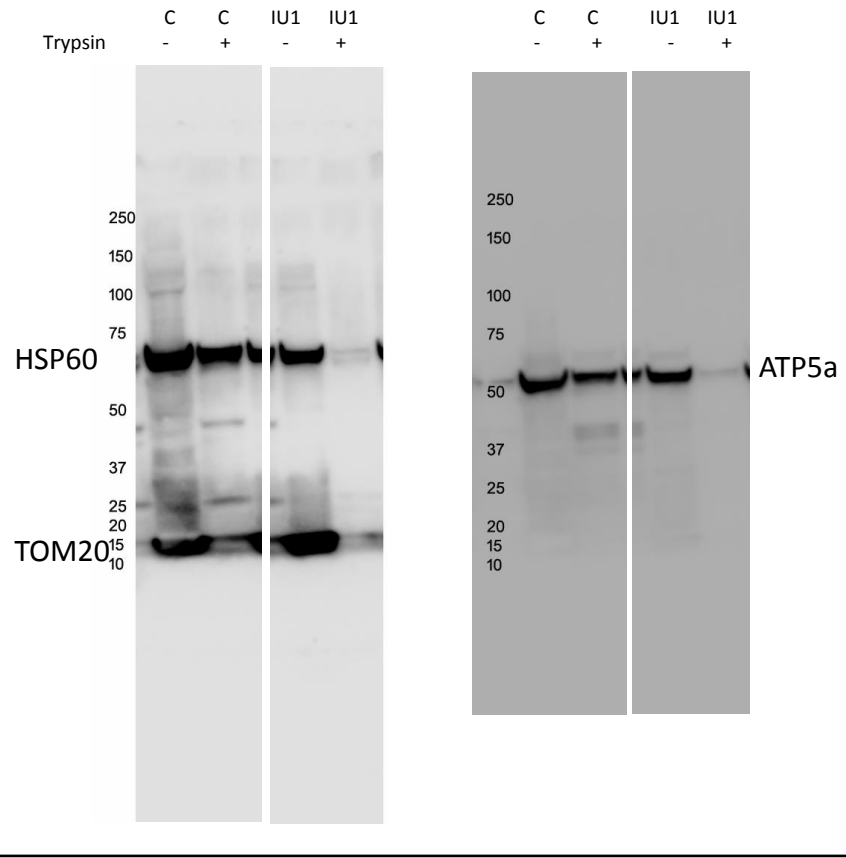

Supplement: EMMM-10-e9014-s007.pdf [file EMMM-10-e9014-s007.pdf]
