# Supplementary material for: USP14 inhibition corrects an in vivo model of impaired mitophagy
Source: PubMed Central journal article supplement (PMC6220287; doi:10.15252/emmm.201809014), 2018-09-24
Supplement: EMMM-10-e9014-s002.pdf [file EMMM-10-e9014-s002.pdf]

Table EV 1 Exact n and p values and statistical test used

| Figure                   | N                                    | P value  | Statistical analysis used        |
|--------------------------|--------------------------------------|----------|----------------------------------|
| 1A                       |                                      | 8        | 0.0042 Two tailed t-test         |
| 1D                       |                                      | 3        | 0.0102 Two tailed t-test         |
| 1E (ATP5a)               |                                      | 3        | 0.0212 Two tailed t-test         |
| 1E (HSP60)               |                                      | 3        | 0.0363 Two tailed t-test         |
| 1H                       |                                      | 3        | 0.043 Two tailed t-test          |
| 1I                       |                                      | 3        | 0.0226 Two tailed t-test         |
| 1K                       |                                      | 3        | 0.0481 Two tailed t-test         |
| 1L                       |                                      | 3        | 0.0062 Two tailed t-test         |
| 1N (Acidic pH)           | Control= 6; IU1 =10                  | < 0.0001 | Two tailed t-test                |
| 1N (Acidic / neutral pH) | Control= 6; IU1 =10                  | 0.0154   | Two tailed t-test                |
| 2B (TOM20)               |                                      | 3        | 0.0244 one way ANOVA/Dunnett's   |
| 2B (DRP1)                |                                      | 4        | 0.0101 one way ANOVA/Dunnett's   |
| 2B (Fis1)                |                                      | 3        | 0.0427 one way ANOVA/Dunnett's   |
| 2B (OPA1)                |                                      | 3        | 0.212 one way ANOVA/Dunnett's    |
| 2B (Mfn1)                |                                      | 4        | P<0.0001 one way ANOVA/Dunnett's |
| 2B (Mfn2)                |                                      | 4        | 0.0139 one way ANOVA/Dunnett's   |
| 2D                       | WT=4; WT+IU1=5                       |          | 0.0427 Two tailed t-test         |
| 2D                       | DRP1KO=4; DRP1 KO+IU1=4              |          | 0.6734 Two tailed t-test         |
| 2D                       | Mfn1 KO=3; Mfn1 KO+IU1=4             |          | 0.0236 Two tailed t-test         |
| 2D                       | Mfn2 KO=4; Mfn2 KO+IU1=4             |          | 0.5473 Two tailed t-test         |
| 2F (HSP60)               | WT=6; WT+IU1=6                       |          | 0.0007 Two tailed t-test         |
| 2F (HSP60)               | Mfn2 KO=3; Mfn2 KO+IU1=3             |          | 0.3484 Two tailed t-test         |
| 2F (HSP60)               | WT+DRP1k38A=3; DRP1k38A+IU1=3        |          | 0.1229 Two tailed t-test         |
| 2F (HSP60)               | DRP1 KO=3; DRP1 KO+IU1=3             |          | 0.1984 Two tailed t-test         |
| 2F (ATP5a)               | WT=3; WT+IU1=3                       |          | 0.0331 Two tailed t-test         |
| 2F (ATP5a)               | Mfn2 KO=3; Mfn2 KO+IU1=3             |          | 0.8911 Two tailed t-test         |
| 2F (ATP5a)               | WT+DRP1k38A=3; DRP1k38A+IU1=3        |          | 0.1764 Two tailed t-test         |
| 2F (ATP5a)               | DRP1 KO=3; DRP1 KO+IU1=3             |          | 0.8137 Two tailed t-test         |
| 3D                       | WT MEF (+/- IU1)=3                   |          | 0.0354 Two tailed t-test         |
| 3D                       | Hela (+/- IU1)=3                     |          | 0.004 Two tailed t-test          |
| 3D                       | PINK1 KO (+/- IU1)=3                 |          | 0.0182 Two tailed t-test         |
| 3E HSP60                 | Control MEF (+/-)=3                  |          | 0.0315 Two tailed t-test         |
| 3E HSP60                 | Hela (+/- IU1)=4                     |          | 0.0076 Two tailed t-test         |
| 3E HSP60                 | PINK1 KO (+/- IU1)=3                 |          | 0.0478 Two tailed t-test         |
| 3E HSP60                 | Control human fibroblast (+/- IU1)=3 |          | 0.0013 Two tailed t-test         |
| 3E HSP60                 | PD patient fibroblast (+/- IU1)=3    |          | 0.016 Two tailed t-test          |
| 3E ATP5a                 | Control MEF (+/-)=5                  |          | 0.0435 Two tailed t-test         |
| 3E ATP5a                 | Hela (+/- IU1)=4                     |          | 0.0057 Two tailed t-test         |
| 3E ATP5a                 | PINK1 KO (+/- IU1)=3                 |          | 0.0092 Two tailed t-test         |
| 3E ATP5a                 | Control human fibroblast (+/- IU1)=3 |          | 0.0142 Two tailed t-test         |
| 3E ATP5a                 | PD patient fibroblast (+/- IU1)=6    |          | 0.0003 Two tailed t-test         |
| 4B                       |                                      | 3        | 0.0002 one way ANOVA/Dunnett's   |
| 4E                       |                                      | 3        | 0.0012 Two tailed t-test         |
| 5A                       |                                      | 3        | 0.0219 Two tailed t-test         |
| 5B HSP60                 |                                      | 4        | 0.034 Two tailed t-test          |
| 5B ATP5a                 |                                      | 4        | 0.0038 Two tailed t-test         |
| 5C                       |                                      | 3        | 0.0257 Two tailed t-test         |

| Figure   | N                                    | P value  | Statistical analysis used  |
|----------|--------------------------------------|----------|----------------------------|
| 5D HSP60 | 3                                    | 0.0111   | Two tailed t-test          |
| 5D ATP5a | 4                                    | 0.046    | Two tailed t-test          |
| 5E       | 3                                    | 0.0318   | Two tailed t-test          |
| 5F HSP60 | 4                                    | 0.041    | Two tailed t-test          |
| 5F ATP5a | 3                                    | 0.0073   | Two tailed t-test          |
| 5G       | 3                                    | 0.0483   | Two tailed t-test          |
| 5H HSP60 | 4                                    | 0.036    | Two tailed t-test          |
| 5H ATP5a | 3                                    | 0.0261   | Two tailed t-test          |
| 5I       | 5                                    | 0.0488   | Two tailed t-test          |
| 5J HSP60 | 4                                    | 0.0436   | Two tailed t-test          |
| 5J ATP5a | 3                                    | 0.0418   | Two tailed t-test          |
| 6A       | WT=50; Pink1=120; Pink1 USP14 KD=57  | < 0.0001 | Log-rank test              |
| 6B       | WT=7; PINK1=5; PINK1 USP14KD= 4      | <0.0001  | One way ANOVA/Newman-Keuls |
| 6C       | WT=5; PINK1=5; PINK1 USP14 KD=4      | 0.0001   | One way ANOVA/Newman-Keuls |
| 6D       | WT=14; PINK1=11; PINK1 USP14 KD=11   | <0.0001  | One way ANOVA/Newman-Keuls |
| 7A       | WT=60; Parkin=60; Parkin USP14 KD=50 | 0.0001   | Log-rank test              |
| 7B       | WT=3; Parkin=3; Parkin USP14 KD=3    | 0.0095   | One way ANOVA/Newman-Keuls |
| 7C       | WT=3; Parkin=3; Parkin USP14 KD=3    | 0.0005   | One way ANOVA/Newman-Keuls |

| Figure                              | N | P value / P value summary | Statistical analysis used |
|-------------------------------------|---|---------------------------|---------------------------|
| S1A                                 | 3 | P<0.0001                  | one way ANOVA/Dunnett's   |
| S1A                                 | 3 | ctrl vs 200uM p=0.0025    | Two tailed t-test         |
| S1A                                 | 3 | ctrl vs 300uM p=0.0003    | Two tailed t-test         |
| S1A                                 | 3 | ctrl vs 400uM p=0.0002    | Two tailed t-test         |
| S1A                                 | 3 | ctrl vs 500uM p=0.0002    | Two tailed t-test         |
| S1B                                 | 3 | 0.0003                    | one way ANOVA/Dunnett's   |
| S2A SH-SY5U                         | 4 | 0.0302                    | Two tailed t-test         |
| S2A MEF                             | 3 | 0.0002                    | Two tailed t-test         |
| S3A                                 | 6 | 0.0018                    | Two tailed t-test         |
| S3C                                 | 3 | 0.0285                    | Two tailed t-test         |
| S3D ATP5a                           | 3 | 0.0285                    | Two tailed t-test         |
| S3D HSP60                           | 3 | 0.0038                    | Two tailed t-test         |
| S3F                                 | 3 | 0.0413                    | Two tailed t-test         |
| S3G                                 | 3 | 0.0423                    | Two tailed t-test         |
| S3J                                 | 3 | 0.0031                    | Two tailed t-test         |
| S3K                                 | 3 | 0.0427                    | Two tailed t-test         |
| S4A                                 | 3 | 0.0022                    | Two tailed t-test         |
| S4B                                 | 3 | 0.029                     | Two tailed t-test         |
| S5A ATP5a (WT vs IU1 only)          | 4 | 0.0002                    | Two tailed t-test         |
| S5A ATP5a (WT vs IU1 + NH4Cl)       | 4 | 0.9892                    | Two tailed t-test         |
| S5A HSP60 (WT vs IU1 only)          | 4 | 0.0143                    | Two tailed t-test         |
| S5A HSP60 (WT vs IU1 + NH4Cl)       | 4 | 0.9354                    | Two tailed t-test         |
| S5B HSP60 (WT vs WT+IU1)            | 3 | 0.0414                    | Two tailed t-test         |
| S5B HSP60 (KO vs KO+IU1)            | 3 | 0.2059                    | Two tailed t-test         |
| S5B ATP5a (WT vs WT+IU1)            | 3 | 0.044                     | Two tailed t-test         |
| S5B ATP5a (KO vs KO+IU1)            | 3 | 0.2229                    | Two tailed t-test         |
| S6B USP14                           | 3 | 0.0445                    | Two tailed t-test         |
| S6B DRP1                            | 3 | 0.0413                    | Two tailed t-test         |
| S6B Mfn2                            | 4 | 0.0007                    | Two tailed t-test         |
| S6B OPA1                            | 3 | 0.0033                    | Two tailed t-test         |
| S6B Fis1                            | 4 | 0.0006                    | Two tailed t-test         |
| S6B TOM20                           | 4 | 0.0002                    | Two tailed t-test         |
| S6D USP14                           | 3 | 0.0005                    | Two tailed t-test         |
| S6D DRP1                            | 3 | 0.0012                    | Two tailed t-test         |
| S6D Mfn2                            | 4 | 0.0092                    | Two tailed t-test         |
| S6D OPA1                            | 4 | 0.0275                    | Two tailed t-test         |
| S6D Fis1                            | 3 | 0.9079                    | Two tailed t-test         |
| S6D TOM20                           | 5 | 0.0397                    | Two tailed t-test         |
| S7B                                 | 3 | 0.0028                    | Two tailed t-test         |
| S8B (PHB2 F/F vs F/F + IU1)         | 4 | 0.0135                    | Two tailed t-test         |
| S8B (PHB2 F/F Cre vs F/F Cre + IU1) | 4 | 0.4843                    | Two tailed t-test         |
| S8D (PHB2 F/F vs F/F + IU1)         | 4 | 0.0264                    | Two tailed t-test         |
| S8D (PHB2 F/F Cre vs F/F Cre + IU1) | 4 | 0.8414                    | Two tailed t-test         |
| S8E (PHB2 F/F vs F/F + IU1)         | 4 | 0.0479                    | Two tailed t-test         |

| Figure                              | N | P value                       | Statistical analysis used      |
|-------------------------------------|---|-------------------------------|--------------------------------|
| S8E (PHB2 F/F Cre vs F/F Cre + IU1) |   | 4                             | 0.1528 Two tailed t-test       |
| S10A                                |   | 60                            | 0.058 Log-rank test            |
| S10B                                |   | 3                             | 0.465 Two tailed t-test        |
| S10C                                |   | 3                             | 0.6967 Two tailed t-test       |
| S11B                                |   | 3                             | 0.0243 Two tailed t-test       |
| S11C                                |   | 3                             | 0.0051 Two tailed t-test       |
| S12A                                |   | 4                             | 0.8274 one way ANOVA/Dunnett's |
| S12B                                |   | 3                             | 0.036 one way ANOVA/Dunnett's  |
| S12B                                |   | 3 ctrl vs IU1 1uM; p=0.1996   | Two tailed t-test              |
| S12B                                |   | 3 ctrl vs IU1 10uM; p=0.0102  | Two tailed t-test              |
| S12B                                |   | 3 ctrl vs IU1 100uM; p=0.0038 | Two tailed t-test              |
| S12C                                |   | 3                             | 0.0148 one way ANOVA/Dunnett's |
| S12D                                |   | 5                             | 0.0292 one way ANOVA/Tukey     |
| S13A                                |   | 60                            | 0.33 Log-rank test             |
| S14A                                |   | 4 P<0.0001                    | One way ANOVA/Newman-Keuls     |
| S15                                 |   | 2                             |                                |
