# Supplementary material for: USP14 inhibition corrects an in vivo model of impaired mitophagy
Source: PubMed Central journal article supplement (PMC6220287; doi:10.15252/emmm.201809014), 2018-09-24

Fig 1A

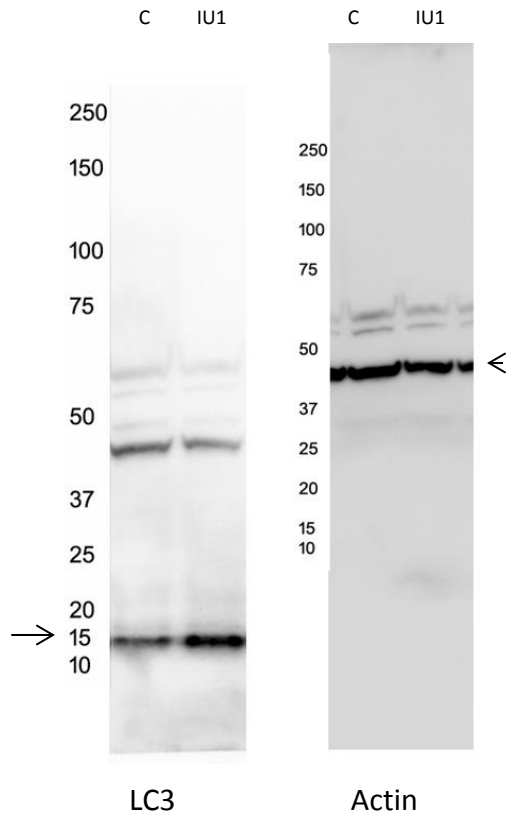

Fig 1E

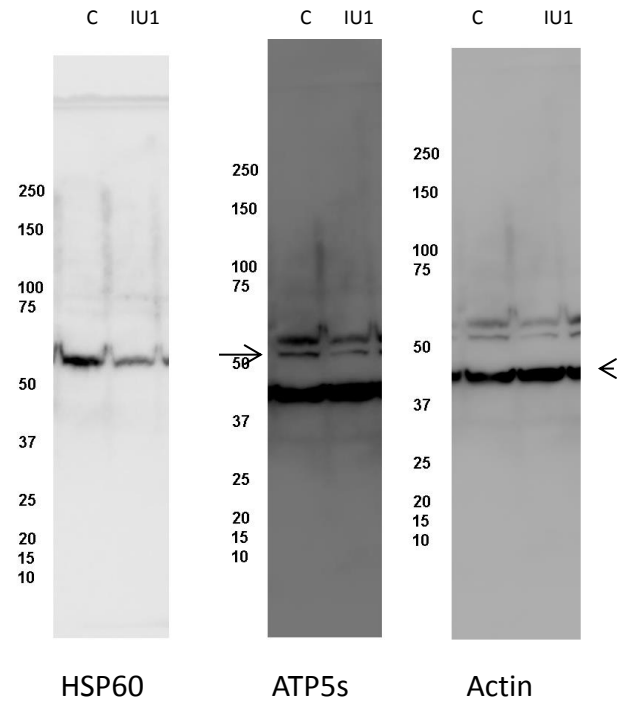

Supplement: EMMM-10-e9014-s003.pdf [file EMMM-10-e9014-s003.pdf]
