# Supplementary material for: USP14 inhibition corrects an in vivo model of impaired mitophagy
Source: PubMed Central journal article supplement (PMC6220287; doi:10.15252/emmm.201809014), 2018-09-24
Supplement: EMMM-10-e9014-s005.pdf [file EMMM-10-e9014-s005.pdf]

# MEF WT

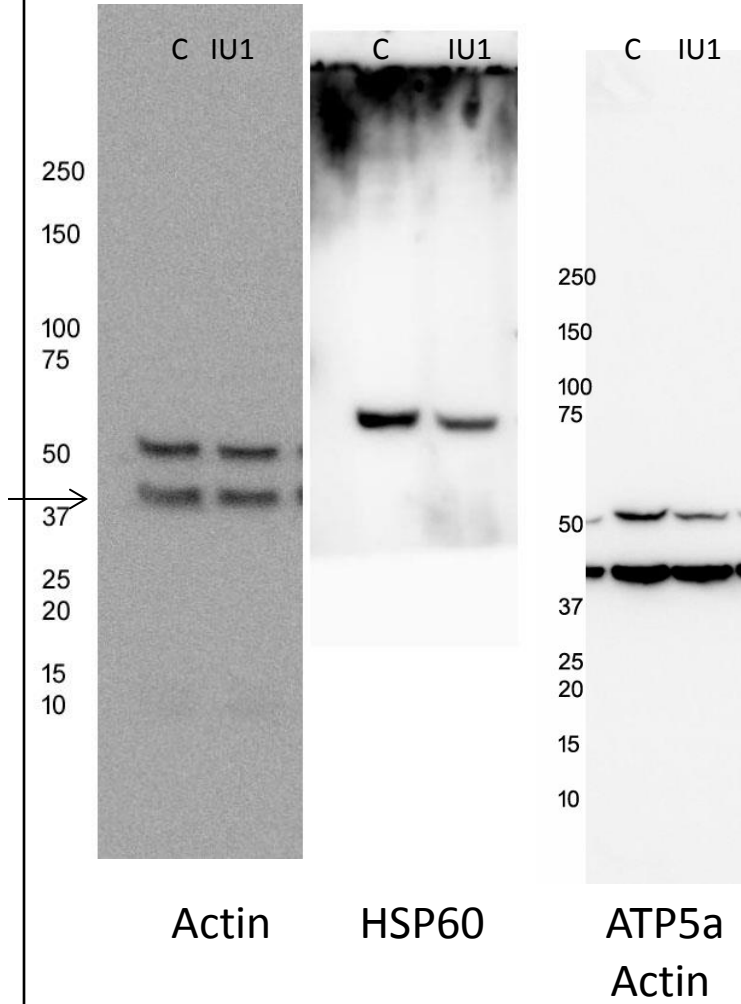

# Hela

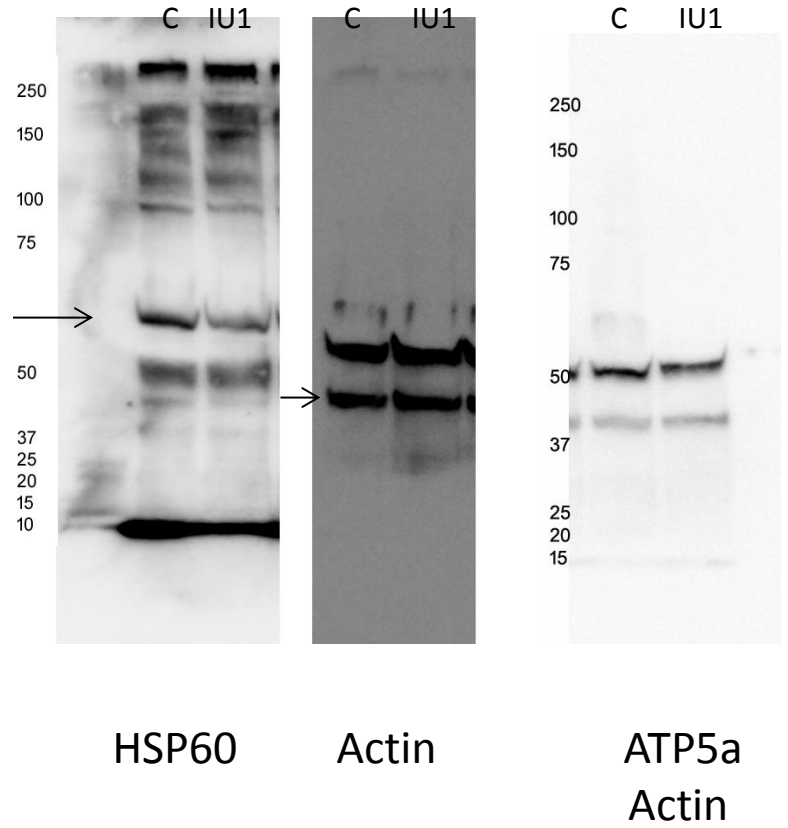

# PINK1 KO

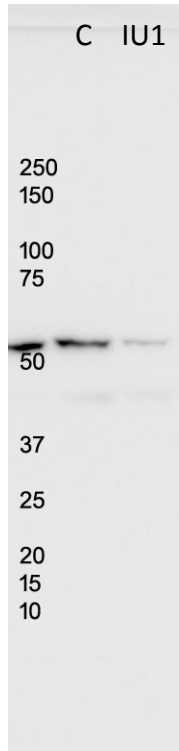

ATP5a

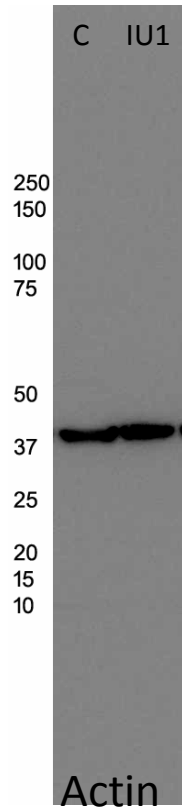

Actin

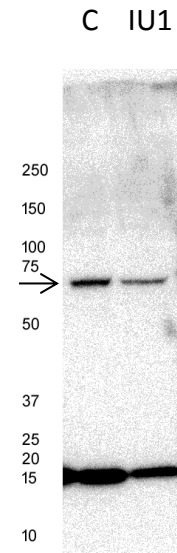

HSP60

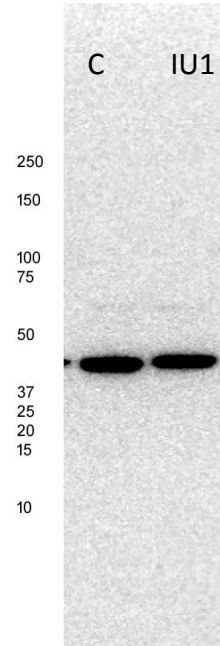

Actin

# Control human

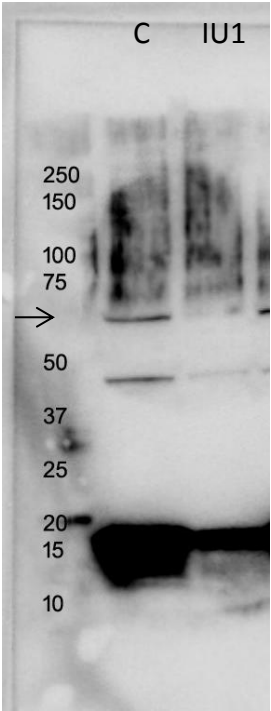

HSP60

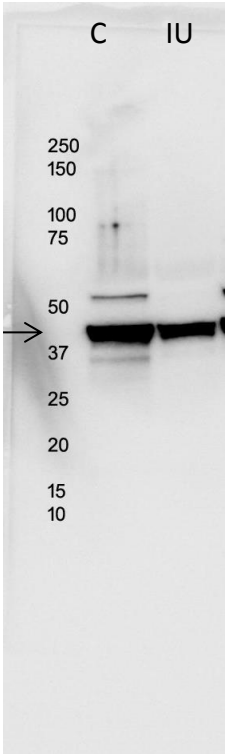

Actin

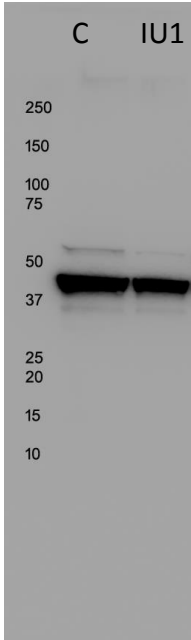

ATP5a  
Actin

# PD patient

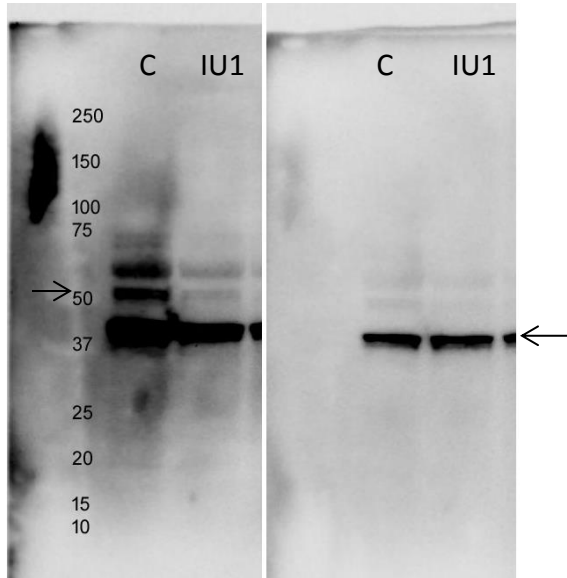

ATP5a

Actin

(Low exposure)

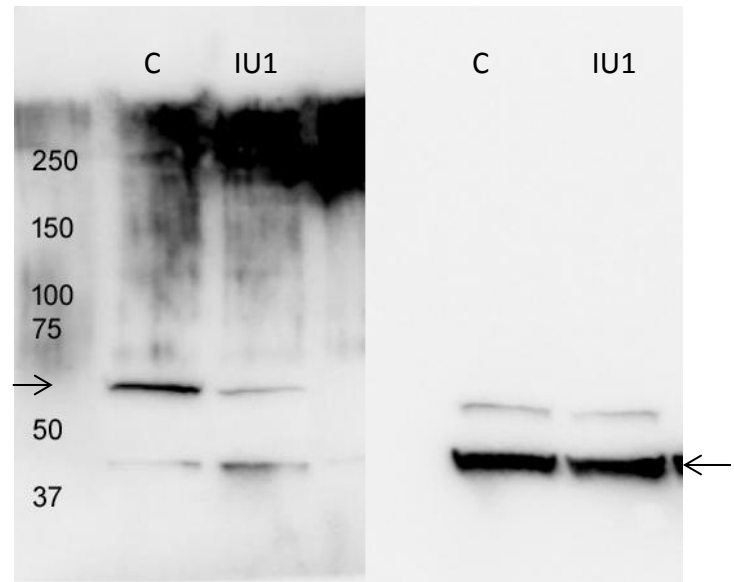

HSP60

Actin
