# Supplementary material for: USP14 inhibition corrects an in vivo model of impaired mitophagy
Source: PubMed Central journal article supplement (PMC6220287; doi:10.15252/emmm.201809014), 2018-09-24

Fig 5B

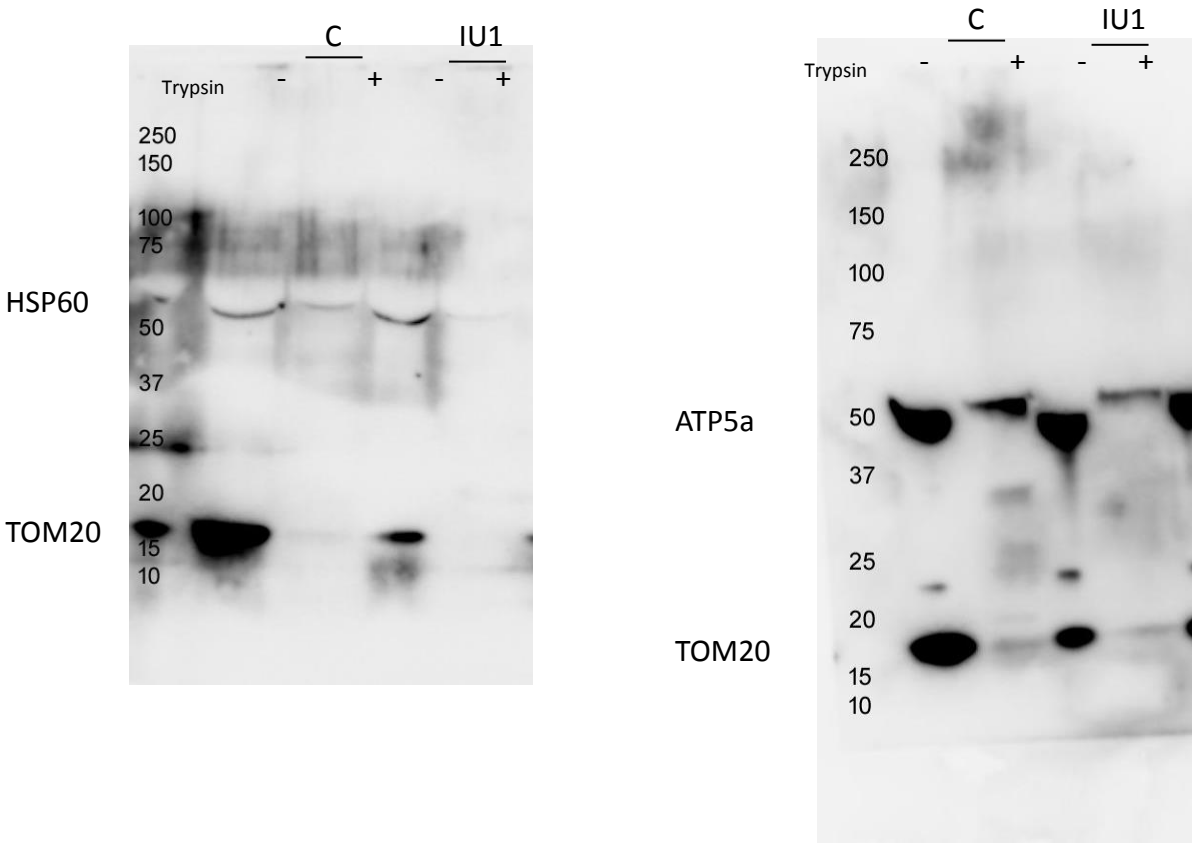

Fig 5D

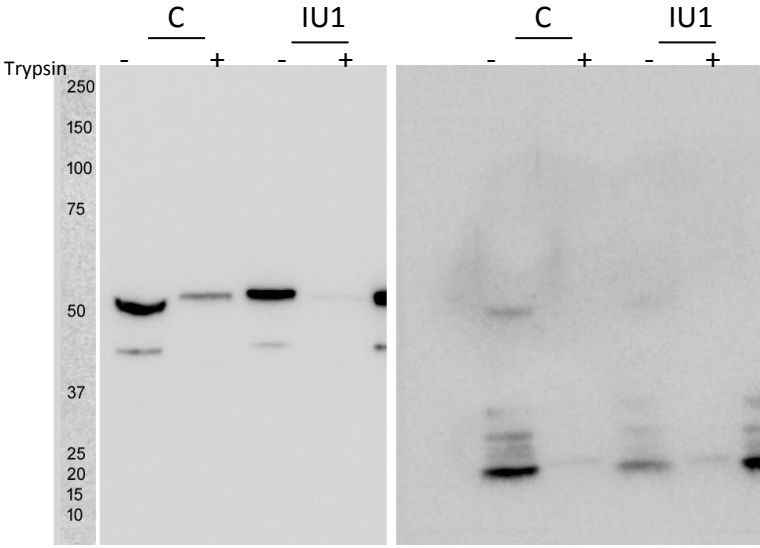

ATP5a

TOM20

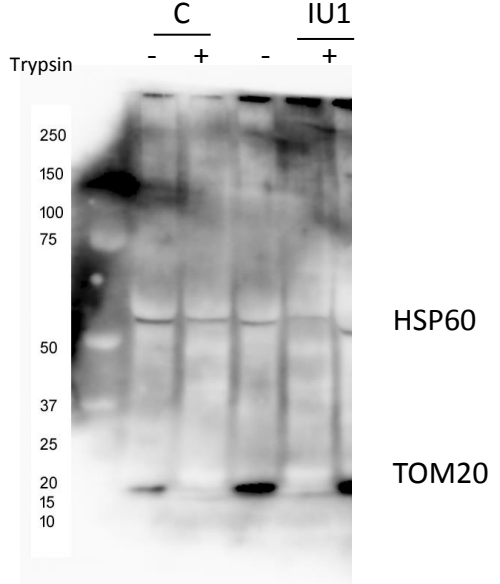

HSP60

TOM20

Fig 5F

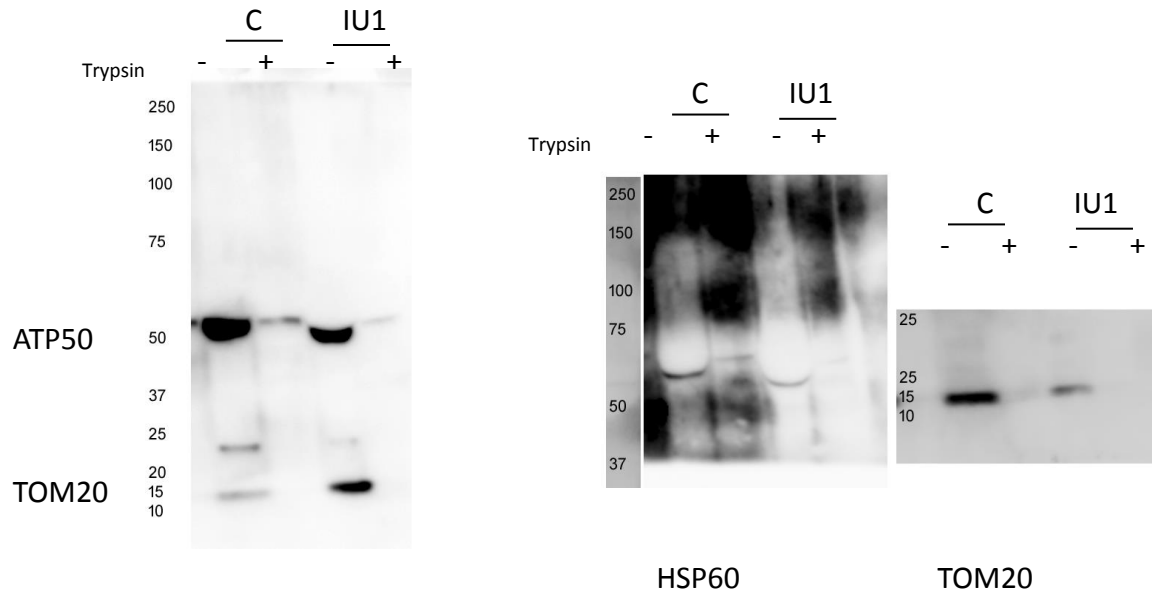

Fig 5H

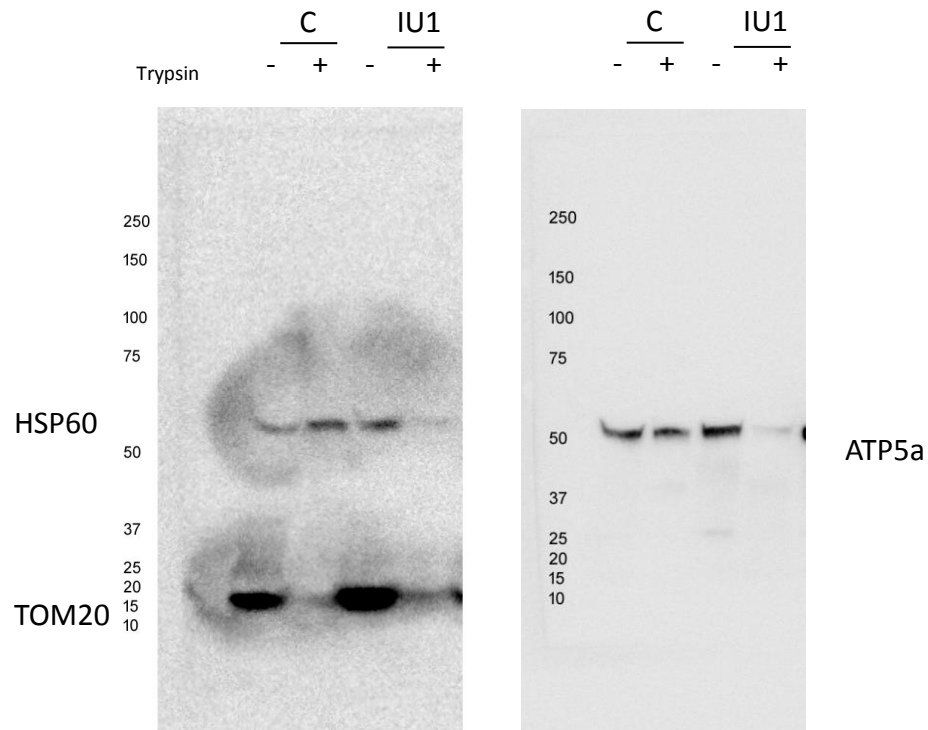

Fig 5J

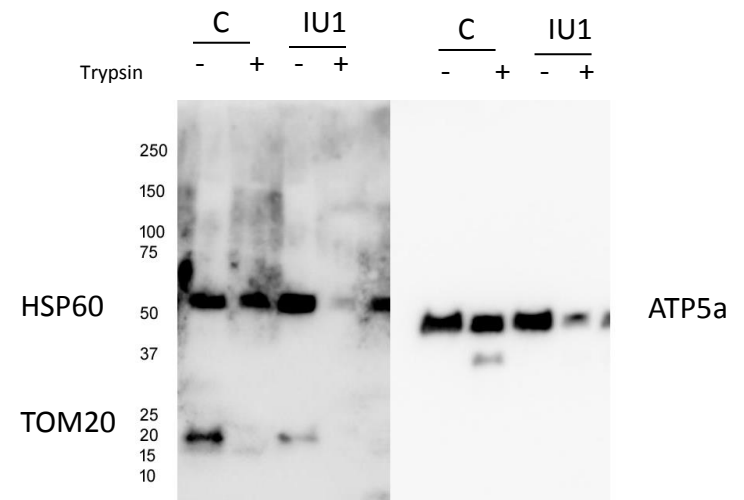

Supplement: EMMM-10-e9014-s006.pdf [file EMMM-10-e9014-s006.pdf]
